# Supplementary material for: Taking the Long View in an Inpatient Medical Unit: A Person-Centered, Integrated Team Approach for Patients With Severe Mental Illnesses
Source: Atypon-hosted journal article supplement (doi:10.1176/appi.ps.201900385), 2020-05-04
Supplement: appi.ps.201900385.ds001.pdf [file appi.ps.201900385.ds001.pdf]

**IMIP Interdisciplinary Meeting Check list**

Data Supplement for Wittink et al. (10.1176/appi.ps.201900385)

| <b>Clinician</b>              | <b>Health Domain</b> | <b>Key Info to present</b>                                                      | <b>Check list</b>                                                                                                                                                                                                                                                                                                                                                    |
|-------------------------------|----------------------|---------------------------------------------------------------------------------|----------------------------------------------------------------------------------------------------------------------------------------------------------------------------------------------------------------------------------------------------------------------------------------------------------------------------------------------------------------------|
| <b>RN (bedside or charge)</b> | Function             | overview/update of patient's functioning and care needs                         | <input type="checkbox"/> is patient sleeping/ambulating/eating/voiding?<br><input type="checkbox"/> is patient engaged in care plan?<br><input type="checkbox"/> are there any behavioral/coping concerns?<br><input type="checkbox"/> what are patient's concerns?                                                                                                  |
| <b>Social Workers</b>         | Social               | overview/update of current home environment and potential barriers to discharge | <input type="checkbox"/> are there housing/transportation/safety concerns?<br><input type="checkbox"/> any relevant family/collateral information?<br><input type="checkbox"/> what is the home situation?<br><input type="checkbox"/> what follow up/home services are needed?                                                                                      |
| <b>Psychiatry</b>             | Psychiatric          | overview/update of patient's psychiatric needs                                  | <input type="checkbox"/> what is the working psych diagnosis /prognosis/acuity?<br><input type="checkbox"/> any planned addition or change in medications?<br><input type="checkbox"/> anticipated date patient will be stable for discharge?<br><input type="checkbox"/> what are plans for psychiatric follow up care?                                             |
| <b>MDs, APPs</b>              | Biomedical           | overview/update of patient's medical needs                                      | <input type="checkbox"/> what is the working diagnosis/prognosis/severity<br><input type="checkbox"/> what labs/imaging etc are needed to answer above?<br><input type="checkbox"/> anticipated date patient will be stable for discharge<br><input type="checkbox"/> are there any chronic medical issues that need follow up or that can be addressed in hospital? |

**Table A1: Behavioral Health Diagnosis Codes Considered in this Study**

| <b>ICD10 Behavioral Health Diagnosis Code* and Description</b>      | <b>Diagnostic Category</b> | <b>ICD10 Behavioral Health Dx Code* and Description</b>             | <b>Diagnostic Category</b> |
|---------------------------------------------------------------------|----------------------------|---------------------------------------------------------------------|----------------------------|
| F0150 - VASCULAR DEMENTIA WITHOUT BEHAVIORAL DISTURBANCE            | Cognitive                  | F29 - UNSP PSYCHOSIS NOT DUE TO A SUBSTANCE OR KNOWN PHYSIOL COND   | Others                     |
| F0151 - VASCULAR DEMENTIA WITH BEHAVIORAL DISTURBANCE               | Cognitive                  | F3010 - MANIC EPISODE WITHOUT PSYCHOTIC SYMPTOMS, UNSPECIFIED       | Mood                       |
| F0280 - DEMENTIA IN OTH DISEASES CLASSD ELSWHR W/O BEHAVRL DISTURB  | Cognitive                  | F302 - MANIC EPISODE, SEVERE WITH PSYCHOTIC SYMPTOMS                | Mood                       |
| F0281 - DEMENTIA IN OTH DISEASES CLASSD ELSWHR W BEHAVIORAL DISTURB | Cognitive                  | F308 - OTHER MANIC EPISODES                                         | Mood                       |
| F0390 - UNSPECIFIED DEMENTIA WITHOUT BEHAVIORAL DISTURBANCE         | Cognitive                  | F309 - MANIC EPISODE, UNSPECIFIED                                   | Mood                       |
| F0391 - UNSPECIFIED DEMENTIA WITH BEHAVIORAL DISTURBANCE            | Cognitive                  | F310 - BIPOLAR DISORDER, CURRENT EPISODE HYPOMANIC                  | Mood                       |
| F04 - AMNESTIC DISORDER DUE TO KNOWN PHYSIOLOGICAL CONDITION        | Cognitive                  | F3110 - BIPOLAR DISORD, CRNT EPISODE MANIC W/O PSYCH FEATURES, UNSP | Mood                       |
| F05 - DELIRIUM DUE TO KNOWN PHYSIOLOGICAL CONDITION                 | Cognitive                  | F3112 - BIPOLAR DISORD, CRNT EPISODE MANIC W/O PSYCH FEATURES, MOD  | Mood                       |
| F060 - PSYCHOTIC DISORDER W HALLUCIN DUE TO KNOWN PHYSIOL CONDITION | Cognitive                  | F312 - BIPOLAR DISORD, CRNT EPISODE MANIC SEVERE W PSYCH FEATURES   | Mood                       |
| F061 - CATATONIC DISORDER DUE TO KNOWN PHYSIOLOGICAL CONDITION      | Cognitive                  | F3130 - BIPOLAR DISORD, CRNT EPSD DEPRESS, MILD OR MOD SEVERT, UNSP | Mood                       |
| F062 - PSYCHOTIC DISORDER W DELUSIONS DUE TO KNOWN PHYSIOL COND     | Cognitive                  | F3132 - BIPOLAR DISORDER, CURRENT EPISODE DEPRESSED, MODERATE       | Mood                       |
| F0631 - MOOD DISORDER DUE TO KNOWN PHYSIOL COND W DEPRESSV FEATURES | Cognitive                  | F314 - BIPOLAR DISORD, CRNT EPSD DEPRESS, SEV, W/O PSYCH FEATURES   | Mood                       |
| F068 - OTH MENTAL DISORDERS DUE TO KNOWN PHYSIOLOGICAL CONDITION    | Cognitive                  | F315 - BIPOLAR DISORD, CRNT EPSD DEPRESS, SEVERE, W PSYCH FEATURES  | Mood                       |
| F070 - PERSONALITY CHANGE DUE TO KNOWN PHYSIOLOGICAL CONDITION      | Cognitive                  | F3160 - BIPOLAR DISORDER, CURRENT EPISODE MIXED, UNSPECIFIED        | Mood                       |
| F0781 - POSTCONCUSSIONAL SYNDROME                                   | Cognitive                  | F3162 - BIPOLAR DISORDER, CURRENT EPISODE MIXED, MODERATE           | Mood                       |

|                                                                      |           |                                                                      |      |
|----------------------------------------------------------------------|-----------|----------------------------------------------------------------------|------|
| F09 - UNSP MENTAL DISORDER DUE TO KNOWN PHYSIOLOGICAL CONDITION      | Cognitive | F3163 - BIPOLAR DISORD, CRNT EPSD MIXED, SEVERE, W/O PSYCH FEATURES  | Mood |
| F1010 - ALCOHOL ABUSE, UNCOMPLICATED                                 | Substance | F3164 - BIPOLAR DISORD, CRNT EPISODE MIXED, SEVERE, W PSYCH FEATURES | Mood |
| F1011 - ALCOHOL ABUSE, IN REMISSION                                  | Substance | F3181 - BIPOLAR II DISORDER                                          | Mood |
| F10120 - ALCOHOL ABUSE WITH INTOXICATION, UNCOMPLICATED              | Substance | F3189 - OTHER BIPOLAR DISORDER                                       | Mood |
| F10121 - ALCOHOL ABUSE WITH INTOXICATION DELIRIUM                    | Substance | F319 - BIPOLAR DISORDER, UNSPECIFIED                                 | Mood |
| F10129 - ALCOHOL ABUSE WITH INTOXICATION, UNSPECIFIED                | Substance | F321 - MAJOR DEPRESSIVE DISORDER, SINGLE EPISODE, MODERATE           | Mood |
| F10151 - ALCOHOL ABUSE W ALCOH-INDUCE PSYCHOTIC DISORDER W HALLUCIN  | Substance | F322 - MAJOR DEPRESSV DISORD, SINGLE EPSD, SEV W/O PSYCH FEATURES    | Mood |
| F10159 - ALCOHOL ABUSE WITH ALCOHOL-INDUCED PSYCHOTIC DISORDER, UNSP | Substance | F323 - MAJOR DEPRESSV DISORD, SINGLE EPSD, SEVERE W PSYCH FEATURES   | Mood |
| F10188 - ALCOHOL ABUSE WITH OTHER ALCOHOL-INDUCED DISORDER           | Substance | F3289 - OTHER SPECIFIED DEPRESSIVE EPISODES                          | Mood |
| F1020 - ALCOHOL DEPENDENCE, UNCOMPLICATED                            | Substance | F329 - MAJOR DEPRESSIVE DISORDER, SINGLE EPISODE, UNSPECIFIED        | Mood |
| F1021 - ALCOHOL DEPENDENCE, IN REMISSION                             | Substance | F330 - MAJOR DEPRESSIVE DISORDER, RECURRENT, MILD                    | Mood |
| F10220 - ALCOHOL DEPENDENCE WITH INTOXICATION, UNCOMPLICATED         | Substance | F331 - MAJOR DEPRESSIVE DISORDER, RECURRENT, MODERATE                | Mood |
| F10221 - ALCOHOL DEPENDENCE WITH INTOXICATION DELIRIUM               | Substance | F332 - MAJOR DEPRESSV DISORDER, RECURRENT SEVERE W/O PSYCH FEATURES  | Mood |
| F10229 - ALCOHOL DEPENDENCE WITH INTOXICATION, UNSPECIFIED           | Substance | F333 - MAJOR DEPRESSV DISORDER, RECURRENT, SEVERE W PSYCH SYMPTOMS   | Mood |
| F10230 - ALCOHOL DEPENDENCE WITH WITHDRAWAL, UNCOMPLICATED           | Substance | F3340 - MAJOR DEPRESSIVE DISORDER, RECURRENT, IN REMISSION, UNSP     | Mood |
| F10231 - ALCOHOL DEPENDENCE WITH WITHDRAWAL DELIRIUM                 | Substance | F3341 - MAJOR DEPRESSIVE DISORDER, RECURRENT, IN PARTIAL REMISSION   | Mood |
| F10232 - ALCOHOL DEPENDENCE W WITHDRAWAL WITH PERCEPTUAL DISTURBANCE | Substance | F338 - OTHER RECURRENT DEPRESSIVE DISORDERS                          | Mood |
| F10239 - ALCOHOL DEPENDENCE WITH WITHDRAWAL, UNSPECIFIED             | Substance | F339 - MAJOR DEPRESSIVE DISORDER, RECURRENT, UNSPECIFIED             | Mood |
| F1024 - ALCOHOL DEPENDENCE WITH ALCOHOL-INDUCED MOOD DISORDER        | Substance | F341 - DYSTHYMIC DISORDER                                            | Mood |
| F10251 - ALCOHOL DEPEND W ALCOH-INDUCE PSYCHOTIC DISORDER W HALLUCIN | Substance | F348 - OTHER PERSISTENT MOOD [AFFECTIVE] DISORDERS                   | Mood |

|                                                                       |           |                                                     |        |
|-----------------------------------------------------------------------|-----------|-----------------------------------------------------|--------|
| F1026 - ALCOHOL DEPEND W ALCOH-INDUCE PERSISTING AMNESTIC DISORDER    | Substance | F3481 - DISRUPTIVE MOOD DYSREGULATION DISORDER      | Mood   |
| F1027 - ALCOHOL DEPENDENCE WITH ALCOHOL-INDUCED PERSISTING DEMENTIA   | Substance | F39 - UNSPECIFIED MOOD [AFFECTIVE] DISORDER         | Mood   |
| F10280 - ALCOHOL DEPENDENCE WITH ALCOHOL-INDUCED ANXIETY DISORDER     | Substance | F4000 - AGORAPHOBIA, UNSPECIFIED                    | Mood   |
| F10288 - ALCOHOL DEPENDENCE WITH OTHER ALCOHOL-INDUCED DISORDER       | Substance | F4001 - AGORAPHOBIA WITH PANIC DISORDER             | Mood   |
| F10921 - ALCOHOL USE, UNSPECIFIED WITH INTOXICATION DELIRIUM          | Substance | F40240 - CLAUSTROPHOBIA                             | Mood   |
| F10929 - ALCOHOL USE, UNSPECIFIED WITH INTOXICATION, UNSPECIFIED      | Substance | F409 - PHOBIC ANXIETY DISORDER, UNSPECIFIED         | Mood   |
| F1094 - ALCOHOL USE, UNSPECIFIED WITH ALCOHOL-INDUCED MOOD DISORDER   | Substance | F410 - PANIC DISORDER [EPISODIC PAROXYSMAL ANXIETY] | Mood   |
| F1096 - ALCOHOL USE, UNSP W ALCOH-INDUCE PERSIST AMNESTIC DISORDER    | Substance | F411 - GENERALIZED ANXIETY DISORDER                 | Mood   |
| F1097 - ALCOHOL USE, UNSP WITH ALCOHOL-INDUCED PERSISTING DEMENTIA    | Substance | F413 - OTHER MIXED ANXIETY DISORDERS                | Mood   |
| F10988 - ALCOHOL USE, UNSPECIFIED WITH OTHER ALCOHOL-INDUCED DISORDER | Substance | F418 - OTHER SPECIFIED ANXIETY DISORDERS            | Mood   |
| F1099 - ALCOHOL USE, UNSP WITH UNSPECIFIED ALCOHOL-INDUCED DISORDER   | Substance | F419 - ANXIETY DISORDER, UNSPECIFIED                | Mood   |
| F1110 - OPIOID ABUSE, UNCOMPLICATED                                   | Substance | F42 - OBSESSIVE-COMPULSIVE DISORDER                 | Mood   |
| F1111 - OPIOID ABUSE, IN REMISSION                                    | Substance | F424 - EXCORIATION (SKIN-PICKING) DISORDER          | Mood   |
| F11120 - OPIOID ABUSE WITH INTOXICATION, UNCOMPLICATED                | Substance | F428 - OTHER OBSESSIVE-COMPULSIVE DISORDER          | Mood   |
| F11121 - OPIOID ABUSE WITH INTOXICATION DELIRIUM                      | Substance | F429 - OBSESSIVE-COMPULSIVE DISORDER, UNSPECIFIED   | Mood   |
| F11129 - OPIOID ABUSE WITH INTOXICATION, UNSPECIFIED                  | Substance | F430 - ACUTE STRESS REACTION                        | Mood   |
| F11150 - OPIOID ABUSE W OPIOID-INDUCED PSYCHOTIC DISORDER W DELUSIONS | Substance | F4310 - POST-TRAUMATIC STRESS DISORDER, UNSPECIFIED | Mood   |
| F11159 - OPIOID ABUSE WITH OPIOID-INDUCED PSYCHOTIC DISORDER, UNSP    | Substance | F4311 - POST-TRAUMATIC STRESS DISORDER, ACUTE       | Mood   |
| F1120 - OPIOID DEPENDENCE, UNCOMPLICATED                              | Substance | F4312 - POST-TRAUMATIC STRESS DISORDER, CHRONIC     | Mood   |
| F1121 - OPIOID DEPENDENCE, IN REMISSION                               | Substance | F4320 - ADJUSTMENT DISORDER, UNSPECIFIED            | Others |
| F11221 - OPIOID DEPENDENCE WITH INTOXICATION                          | Substance | F4321 - ADJUSTMENT DISORDER WITH DEPRESSED          | Others |

| DELIRIUM                                                              |           | MOOD                                                                |        |
|-----------------------------------------------------------------------|-----------|---------------------------------------------------------------------|--------|
| F1123 - OPIOID DEPENDENCE WITH WITHDRAWAL                             | Substance | F4322 - ADJUSTMENT DISORDER WITH ANXIETY                            | Others |
| F1124 - OPIOID DEPENDENCE WITH OPIOID-INDUCED MOOD DISORDER           | Substance | F4323 - ADJUSTMENT DISORDER WITH MIXED ANXIETY AND DEPRESSED MOOD   | Others |
| F1190 - OPIOID USE, UNSPECIFIED, UNCOMPLICATED                        | Substance | F4324 - ADJUSTMENT DISORDER WITH DISTURBANCE OF CONDUCT             | Others |
| F11921 - OPIOID USE, UNSPECIFIED WITH INTOXICATION DELIRIUM           | Substance | F4325 - ADJUSTMENT DISORDER W MIXED DISTURB OF EMOTIONS AND CONDUCT | Others |
| F11951 - OPIOID USE, UNSP W OPIOID-INDUC PSYCH DISORDER W HALLUCIN    | Substance | F4329 - ADJUSTMENT DISORDER WITH OTHER SYMPTOMS                     | Others |
| F1210 - CANNABIS ABUSE, UNCOMPLICATED                                 | Substance | F438 - OTHER REACTIONS TO SEVERE STRESS                             | Others |
| F1211 - CANNABIS ABUSE, IN REMISSION                                  | Substance | F439 - REACTION TO SEVERE STRESS, UNSPECIFIED                       | Others |
| F12121 - CANNABIS ABUSE WITH INTOXICATION DELIRIUM                    | Substance | F440 - DISSOCIATIVE AMNESIA                                         | Others |
| F12129 - CANNABIS ABUSE WITH INTOXICATION, UNSPECIFIED                | Substance | F444 - CONVERSION DISORDER WITH MOTOR SYMPTOM OR DEFICIT            | Others |
| F12150 - CANNABIS ABUSE WITH PSYCHOTIC DISORDER WITH DELUSIONS        | Substance | F445 - CONVERSION DISORDER WITH SEIZURES OR CONVULSIONS             | Others |
| F12188 - CANNABIS ABUSE WITH OTHER CANNABIS-INDUCED DISORDER          | Substance | F446 - CONVERSION DISORDER WITH SENSORY SYMPTOM OR DEFICIT          | Others |
| F1220 - CANNABIS DEPENDENCE, UNCOMPLICATED                            | Substance | F447 - CONVERSION DISORDER WITH MIXED SYMPTOM PRESENTATION          | Others |
| F12259 - CANNABIS DEPENDENCE WITH PSYCHOTIC DISORDER, UNSPECIFIED     | Substance | F4489 - OTHER DISSOCIATIVE AND CONVERSION DISORDERS                 | Others |
| F12288 - CANNABIS DEPENDENCE WITH OTHER CANNABIS-INDUCED DISORDER     | Substance | F449 - DISSOCIATIVE AND CONVERSION DISORDER, UNSPECIFIED            | Others |
| F1290 - CANNABIS USE, UNSPECIFIED, UNCOMPLICATED                      | Substance | F450 - SOMATIZATION DISORDER                                        | Others |
| F1310 - SEDATIVE, HYPNOTIC OR ANXIOLYTIC ABUSE, UNCOMPLICATED         | Substance | F451 - UNDIFFERENTIATED SOMATOFORM DISORDER                         | Others |
| F13129 - SEDATIVE, HYPNOTIC OR ANXIOLYTIC ABUSE W INTOXICATION, UNSP  | Substance | F4521 - HYPOCHONDRIASIS                                             | Others |
| F1320 - SEDATIVE, HYPNOTIC OR ANXIOLYTIC DEPENDENCE, UNCOMPLICATED    | Substance | F4522 - BODY DYSMORPHIC DISORDER                                    | Others |
| F1321 - SEDATIVE, HYPNOTIC OR ANXIOLYTIC DEPENDENCE, IN REMISSION     | Substance | F4541 - PAIN DISORDER EXCLUSIVELY RELATED TO PSYCHOLOGICAL FACTORS  | Others |
| F13230 - SEDATV/HYP/ANXIOLYTIC DEPENDENCE W WITHDRAWAL, UNCOMPLICATED | Substance | F4542 - PAIN DISORDER WITH RELATED PSYCHOLOGICAL FACTORS            | Others |

|                                                                         |           |                                                                    |        |
|-------------------------------------------------------------------------|-----------|--------------------------------------------------------------------|--------|
| F13231 - SEDATV/HYP/ANXIOLYTIC DEPENDENCE W WITHDRAWAL DELIRIUM         | Substance | F458 - OTHER SOMATOFORM DISORDERS                                  | Others |
| F13232 - SEDATV/HYP/ANXIOLYTIC DEPEND W W/DRAWAL W PERCEPTUAL DISTURB   | Substance | F459 - SOMATOFORM DISORDER, UNSPECIFIED                            | Others |
| F13239 - SEDATV/HYP/ANXIOLYTIC DEPENDENCE W WITHDRAWAL, UNSP            | Substance | F481 - DEPERSONALIZATION-DEREALIZATION SYNDROME                    | Others |
| F1390 - SEDATIVE, HYPNOTIC, OR ANXIOLYTIC USE, UNSP, UNCOMPLICATED      | Substance | F482 - PSEUDOBULBAR AFFECT                                         | Others |
| F13980 - SEDATV/HYP/ANXIOLYTIC USE, UNSP W ANXIETY DISORDER             | Substance | F488 - OTHER SPECIFIED NONPSYCHOTIC MENTAL DISORDERS               | Others |
| F1410 - COCAINE ABUSE, UNCOMPLICATED                                    | Substance | F5000 - ANOREXIA NERVOSA, UNSPECIFIED                              | Others |
| F1411 - COCAINE ABUSE, IN REMISSION                                     | Substance | F5001 - ANOREXIA NERVOSA, RESTRICTING TYPE                         | Others |
| F14120 - COCAINE ABUSE WITH INTOXICATION, UNCOMPLICATED                 | Substance | F5002 - ANOREXIA NERVOSA, BINGE EATING/PURGING TYPE                | Others |
| F14121 - COCAINE ABUSE WITH INTOXICATION WITH DELIRIUM                  | Substance | F502 - BULIMIA NERVOSA                                             | Others |
| F14129 - COCAINE ABUSE WITH INTOXICATION, UNSPECIFIED                   | Substance | F508 - OTHER EATING DISORDERS                                      | Others |
| F1414 - COCAINE ABUSE WITH COCAINE-INDUCED MOOD DISORDER                | Substance | F5081 - BINGE EATING DISORDER                                      | Others |
| F14150 - COCAINE ABUSE W COCAINE-INDUCED PSYCHOTIC DISORDER W DELUSIONS | Substance | F5082 - AVOIDANT/RESTRICTIVE FOOD INTAKE DISORDER                  | Others |
| F14151 - COCAINE ABUSE W COCAINE-INDUCED PSYCHOTIC DISORDER W HALLUCIN  | Substance | F5089 - OTHER SPECIFIED EATING DISORDER                            | Others |
| F14188 - COCAINE ABUSE WITH OTHER COCAINE-INDUCED DISORDER              | Substance | F509 - EATING DISORDER, UNSPECIFIED                                | Others |
| F1420 - COCAINE DEPENDENCE, UNCOMPLICATED                               | Substance | F5101 - PRIMARY INSOMNIA                                           | Others |
| F1421 - COCAINE DEPENDENCE, IN REMISSION                                | Substance | F5105 - INSOMNIA DUE TO OTHER MENTAL DISORDER                      | Others |
| F14220 - COCAINE DEPENDENCE WITH INTOXICATION, UNCOMPLICATED            | Substance | F513 - SLEEPWALKING [SOMNAMBULISM]                                 | Others |
| F14221 - COCAINE DEPENDENCE WITH INTOXICATION DELIRIUM                  | Substance | F514 - SLEEP TERRORS [NIGHT TERRORS]                               | Others |
| F14229 - COCAINE DEPENDENCE WITH INTOXICATION, UNSPECIFIED              | Substance | F515 - NIGHTMARE DISORDER                                          | Others |
| F1423 - COCAINE DEPENDENCE WITH WITHDRAWAL                              | Substance | F519 - SLEEP DISORDER NOT DUE TO A SUB OR KNOWN PHYSIOL COND, UNSP | Others |
| F1424 - COCAINE DEPENDENCE WITH COCAINE-INDUCED MOOD DISORDER           | Substance | F524 - PREMATURE EJACULATION                                       | Others |

|                                                                       |           |                                                                    |        |
|-----------------------------------------------------------------------|-----------|--------------------------------------------------------------------|--------|
| F14288 - COCAINE DEPENDENCE WITH OTHER COCAINE-INDUCED DISORDER       | Substance | F54 - PSYCH & BEHAVRL FACTORS ASSOC W DISORD OR DIS CLASSD ELSWHR  | Others |
| F1490 - COCAINE USE, UNSPECIFIED, UNCOMPLICATED                       | Substance | F552 - ABUSE OF LAXATIVES                                          | Others |
| F14920 - COCAINE USE, UNSPECIFIED WITH INTOXICATION, UNCOMPLICATED    | Substance | F553 - ABUSE OF STEROIDS OR HORMONES                               | Others |
| F14929 - COCAINE USE, UNSPECIFIED WITH INTOXICATION, UNSPECIFIED      | Substance | F558 - ABUSE OF OTHER NON-PSYCHOACTIVE SUBSTANCES                  | Others |
| F1499 - COCAINE USE, UNSP WITH UNSPECIFIED COCAINE-INDUCED DISORDER   | Substance | F59 - UNSP BEHAVRL SYND ASSOC W PHYSIOL DISTURB AND PHYSCL FACTORS | Others |
| F1510 - OTHER STIMULANT ABUSE, UNCOMPLICATED                          | Substance | F600 - PARANOID PERSONALITY DISORDER                               | Others |
| F1511 - OTHER STIMULANT ABUSE, IN REMISSION                           | Substance | F601 - SCHIZOID PERSONALITY DISORDER                               | Others |
| F15121 - OTHER STIMULANT ABUSE WITH INTOXICATION DELIRIUM             | Substance | F602 - ANTISOCIAL PERSONALITY DISORDER                             | Others |
| F15150 - OTH STIMULANT ABUSE W STIM-INDUCE PSYCH DISORDER W DELUSIONS | Substance | F603 - BORDERLINE PERSONALITY DISORDER                             | Others |
| F1520 - OTHER STIMULANT DEPENDENCE, UNCOMPLICATED                     | Substance | F604 - HISTRIONIC PERSONALITY DISORDER                             | Others |
| F1521 - OTHER STIMULANT DEPENDENCE, IN REMISSION                      | Substance | F605 - OBSESSIVE-COMPULSIVE PERSONALITY DISORDER                   | Others |
| F15229 - OTHER STIMULANT DEPENDENCE WITH INTOXICATION, UNSPECIFIED    | Substance | F606 - AVOIDANT PERSONALITY DISORDER                               | Others |
| F1523 - OTHER STIMULANT DEPENDENCE WITH WITHDRAWAL                    | Substance | F607 - DEPENDENT PERSONALITY DISORDER                              | Others |
| F1593 - OTHER STIMULANT USE, UNSPECIFIED WITH WITHDRAWAL              | Substance | F6081 - NARCISSISTIC PERSONALITY DISORDER                          | Others |
| F15951 - OTH STIM USE, UNSP W STIM-INDUCE PSYCH DISORDER W HALLUCIN   | Substance | F6089 - OTHER SPECIFIC PERSONALITY DISORDERS                       | Others |
| F1610 - HALLUCINOGEN ABUSE, UNCOMPLICATED                             | Substance | F609 - PERSONALITY DISORDER, UNSPECIFIED                           | Others |
| F16183 - HALLUCIGN ABUSE W HALLUCIGN PERSISTING PERCEPTION DISORDER   | Substance | F633 - TRICHOTILLOMANIA                                            | Others |
| F1620 - HALLUCINOGEN DEPENDENCE, UNCOMPLICATED                        | Substance | F6381 - INTERMITTENT EXPLOSIVE DISORDER                            | Others |
| F17200 - NICOTINE DEPENDENCE, UNSPECIFIED, UNCOMPLICATED              | Smoking   | F6389 - OTHER IMPULSE DISORDERS                                    | Others |
| F17201 - NICOTINE DEPENDENCE, UNSPECIFIED, IN REMISSION               | Smoking   | F639 - IMPULSE DISORDER, UNSPECIFIED                               | Others |
| F17209 - NICOTINE DEPENDENCE, UNSP, W UNSP NICOTINE-INDUCED DISORDERS | Smoking   | F640 - TRANSSEXUALISM                                              | Others |
| F17210 - NICOTINE DEPENDENCE, CIGARETTES,                             | Smoking   | F641 - DUAL ROLE TRANSVESTISM                                      | Others |

|                                                                      |           |                                                                      |           |
|----------------------------------------------------------------------|-----------|----------------------------------------------------------------------|-----------|
| UNCOMPLICATED                                                        |           |                                                                      |           |
| F17211 - NICOTINE DEPENDENCE, CIGARETTES, IN REMISSION               | Smoking   | F648 - OTHER GENDER IDENTITY DISORDERS                               | Others    |
| F17213 - NICOTINE DEPENDENCE, CIGARETTES, WITH WITHDRAWAL            | Smoking   | F649 - GENDER IDENTITY DISORDER, UNSPECIFIED                         | Others    |
| F17218 - NICOTINE DEPENDENCE, CIGARETTES, W OTH DISORDERS            | Smoking   | F6810 - FACTITIOUS DISORDER, UNSPECIFIED                             | Others    |
| F17220 - NICOTINE DEPENDENCE, CHEWING TOBACCO, UNCOMPLICATED         | Smoking   | F6811 - FACTITIOUS DISORDER W PREDOM PSYCH SIGNS AND SYMPTOMS        | Others    |
| F17290 - NICOTINE DEPENDENCE, OTHER TOBACCO PRODUCT, UNCOMPLICATED   | Smoking   | F6812 - FACTITIOUS DISORDER W PREDOM PHYSICAL SIGNS AND SYMPTOMS     | Others    |
| F1810 - INHALANT ABUSE, UNCOMPLICATED                                | Substance | F6813 - FACTITIOUS DISORD W COMB PSYCH AND PHYSCL SIGNS AND SYMPTOMS | Others    |
| F1820 - INHALANT DEPENDENCE, UNCOMPLICATED                           | Substance | F688 - OTHER SPECIFIED DISORDERS OF ADULT PERSONALITY AND BEHAVIOR   | Others    |
| F18288 - INHALANT DEPENDENCE WITH OTHER INHALANT-INDUCED DISORDER    | Substance | F69 - UNSPECIFIED DISORDER OF ADULT PERSONALITY AND BEHAVIOR         | Others    |
| F1910 - OTHER PSYCHOACTIVE SUBSTANCE ABUSE, UNCOMPLICATED            | Substance | F70 - MILD INTELLECTUAL DISABILITIES                                 | Childhood |
| F1911 - OTHER PSYCHOACTIVE SUBSTANCE ABUSE, IN REMISSION             | Substance | F71 - MODERATE INTELLECTUAL DISABILITIES                             | Childhood |
| F19120 - OTH PSYCHOACTIVE SUBSTANCE ABUSE W INTOXICATION, UNCOMP     | Substance | F72 - SEVERE INTELLECTUAL DISABILITIES                               | Childhood |
| F19121 - OTH PSYCHOACTIVE SUBSTANCE ABUSE WITH INTOXICATION DELIRIUM | Substance | F73 - PROFOUND INTELLECTUAL DISABILITIES                             | Childhood |
| F19129 - OTHER PSYCHOACTIVE SUBSTANCE ABUSE WITH INTOXICATION, UNSP  | Substance | F79 - UNSPECIFIED INTELLECTUAL DISABILITIES                          | Childhood |
| F1914 - OTH PSYCHOACTIVE SUBSTANCE ABUSE W MOOD DISORDER             | Substance | F801 - EXPRESSIVE LANGUAGE DISORDER                                  | Childhood |
| F19159 - OTH PSYCHOACTIVE SUBSTANCE ABUSE W PSYCHOTIC DISORDER, UNSP | Substance | F802 - MIXED RECEPTIVE-EXPRESSIVE LANGUAGE DISORDER                  | Childhood |
| F1919 - OTH PSYCHOACTIVE SUBSTANCE ABUSE W UNSP DISORDER             | Substance | F8081 - CHILDHOOD ONSET FLUENCY DISORDER                             | Childhood |
| F1920 - OTHER PSYCHOACTIVE SUBSTANCE DEPENDENCE, UNCOMPLICATED       | Substance | F809 - DEVELOPMENTAL DISORDER OF SPEECH AND LANGUAGE, UNSPECIFIED    | Childhood |
| F1921 - OTHER PSYCHOACTIVE SUBSTANCE DEPENDENCE, IN REMISSION        | Substance | F8189 - OTHER DEVELOPMENTAL DISORDERS OF SCHOLASTIC SKILLS           | Childhood |
| F19230 - OTH PSYCHOACTIVE SUBSTANCE DEPENDENCE W WITHDRAWAL, UNCOMP  | Substance | F819 - DEVELOPMENTAL DISORDER OF SCHOLASTIC SKILLS, UNSPECIFIED      | Childhood |



|                                                                       |           |                                                                     |           |
|-----------------------------------------------------------------------|-----------|---------------------------------------------------------------------|-----------|
| F19231 - OTH PSYCHOACTIVE SUBSTANCE DEPENDENCE W WITHDRAWAL DELIRIUM  | Substance | F840 - AUTISTIC DISORDER                                            | Childhood |
| F19239 - OTH PSYCHOACTIVE SUBSTANCE DEPENDENCE WITH WITHDRAWAL, UNSP  | Substance | F842 - RETT'S SYNDROME                                              | Childhood |
| F19251 - OTH PSYCHOACTV SUBSTANCE DEPEND W PSYCH DISORDER W HALLUCIN  | Substance | F845 - ASPERGER'S SYNDROME                                          | Childhood |
| F1990 - OTHER PSYCHOACTIVE SUBSTANCE USE, UNSPECIFIED, UNCOMPLICATED  | Substance | F849 - PERVASIVE DEVELOPMENTAL DISORDER, UNSPECIFIED                | Childhood |
| F19921 - OTH PSYCHOACTIVE SUBSTANCE USE, UNSP W INTOX W DELIRIUM      | Substance | F88 - OTHER DISORDERS OF PSYCHOLOGICAL DEVELOPMENT                  | Childhood |
| F19929 - OTH PSYCHOACTIVE SUBSTANCE USE, UNSP WITH INTOXICATION, UNSP | Substance | F89 - UNSPECIFIED DISORDER OF PSYCHOLOGICAL DEVELOPMENT             | Childhood |
| F19931 - OTH PSYCHOACTIVE SUBSTANCE USE, UNSP W WITHDRAWAL DELIRIUM   | Substance | F900 - ATTN-DEFCT HYPERACTIVITY DISORDER, PREDOM INATTENTIVE TYPE   | Childhood |
| F19939 - OTHER PSYCHOACTIVE SUBSTANCE USE, UNSP WITH WITHDRAWAL, UNSP | Substance | F901 - ATTN-DEFCT HYPERACTIVITY DISORDER, PREDOM HYPERACTIVE TYPE   | Childhood |
| F1994 - OTH PSYCHOACTIVE SUBSTANCE USE, UNSP W MOOD DISORDER          | Substance | F902 - ATTENTION-DEFICIT HYPERACTIVITY DISORDER, COMBINED TYPE      | Childhood |
| F19950 - OTH PSYCHOACTV SUB USE, UNSP W PSYCH DISORDER W DELUSIONS    | Substance | F909 - ATTENTION-DEFICIT HYPERACTIVITY DISORDER, UNSPECIFIED TYPE   | Childhood |
| F19959 - OTH PSYCHOACTV SUBSTANCE USE, UNSP W PSYCH DISORDER, UNSP    | Substance | F911 - CONDUCT DISORDER, CHILDHOOD-ONSET TYPE                       | Childhood |
| F19982 - OTH PSYCHOACTIVE SUBSTANCE USE, UNSP W SLEEP DISORDER        | Substance | F913 - OPPOSITIONAL DEFIANT DISORDER                                | Childhood |
| F200 - PARANOID SCHIZOPHRENIA                                         | Psychotic | F918 - OTHER CONDUCT DISORDERS                                      | Childhood |
| F201 - DISORGANIZED SCHIZOPHRENIA                                     | Psychotic | F919 - CONDUCT DISORDER, UNSPECIFIED                                | Childhood |
| F202 - CATATONIC SCHIZOPHRENIA                                        | Psychotic | F940 - SELECTIVE MUTISM                                             | Others    |
| F203 - UNDIFFERENTIATED SCHIZOPHRENIA                                 | Psychotic | F952 - TOURETTE'S DISORDER                                          | Others    |
| F205 - RESIDUAL SCHIZOPHRENIA                                         | Psychotic | F985 - ADULT ONSET FLUENCY DISORDER                                 | Others    |
| F2089 - OTHER SCHIZOPHRENIA                                           | Psychotic | F988 - OTH BEHAV/EMOTN DISORD W ONSET USLY OCCUR IN CHLDHD AND ADOL | Others    |
| F209 - SCHIZOPHRENIA, UNSPECIFIED                                     | Psychotic | F99 - MENTAL DISORDER, NOT OTHERWISE SPECIFIED                      | Others    |
| F21 - SCHIZOTYPAL DISORDER                                            | Psychotic |                                                                     |           |
| F22 - DELUSIONAL DISORDERS                                            | Psychotic |                                                                     |           |
| F23 - BRIEF PSYCHOTIC DISORDER                                        | Psychotic |                                                                     |           |

|                                                  |           |  |  |
|--------------------------------------------------|-----------|--|--|
| F250 - SCHIZOAFFECTIVE DISORDER, BIPOLAR TYPE    | Psychotic |  |  |
| F251 - SCHIZOAFFECTIVE DISORDER, DEPRESSIVE TYPE | Psychotic |  |  |
| F258 - OTHER SCHIZOAFFECTIVE DISORDERS           | Psychotic |  |  |
| F259 - SCHIZOAFFECTIVE DISORDER, UNSPECIFIED     | Psychotic |  |  |

\* There is an implied decimal point after the first 3 characters

**Table A2: Full Regression Output – Main Analysis**

| Covariate             | LOS                               |                                         | Discharge to Home                |                                        | 30-Day Readmission               |                                        |
|-----------------------|-----------------------------------|-----------------------------------------|----------------------------------|----------------------------------------|----------------------------------|----------------------------------------|
|                       | Full Sample (Coefficient, 95% CI) | Higher Complexity (Coefficient, 95% CI) | Full Sample (Odds Ratio, 95% CI) | Higher Complexity (Odds Ratio, 95% CI) | Full Sample (Odds Ratio, 95% CI) | Higher Complexity (Odds Ratio, 95% CI) |
| IMIP=1                | -0.211 [-0.816 , 0.394]           | -1.036 [-2.047 , -0.025]                | 1.077 [0.942 , 1.231]            | 1.512 [1.213 , 1.884]                  | 1.024 [0.832 , 1.262]            | 0.692 [0.511 , 0.936]                  |
| Female=1              | 0.18 [-0.347 , 0.708]             | 0.56 [-0.557 , 1.678]                   | 1.063 [0.861 , 1.312]            | 0.9 [0.608 , 1.332]                    | 1.043 [0.74 , 1.472]             | 0.853 [0.507 , 1.434]                  |
| Age: 46-60            | 0.246 [-0.282 , 0.774]            | -0.408 [-1.452 , 0.637]                 | 0.803 [0.678 , 0.952]            | 0.84 [0.586 , 1.204]                   | 0.827 [0.627 , 1.091]            | 0.911 [0.567 , 1.465]                  |
| Age: 61-75            | 1.088 [0.321 , 1.855]             | 1.432 [-0.268 , 3.131]                  | 0.498 [0.417 , 0.594]            | 0.436 [0.284 , 0.671]                  | 0.839 [0.616 , 1.144]            | 0.703 [0.388 , 1.272]                  |
| Age: >75              | 0.424 [-0.403 , 1.25]             | 0.606 [-2.911 , 4.124]                  | 0.216 [0.174 , 0.268]            | 0.331 [0.127 , 0.86]                   | 0.522 [0.37 , 0.735]             | 0.284 [0.056 , 1.447]                  |
| Female x Age 46-60    | -0.665 [-1.476 , 0.146]           | 0.056 [-1.96 , 2.071]                   | 0.823 [0.634 , 1.069]            | 0.927 [0.561 , 1.53]                   | 1.012 [0.663 , 1.545]            | 1.563 [0.779 , 3.139]                  |
| Female x Age 61-75    | -0.979 [-1.858 , -0.101]          | -2.644 [-4.622 , -0.666]                | 0.759 [0.588 , 0.979]            | 1.287 [0.722 , 2.295]                  | 0.874 [0.581 , 1.315]            | 1.109 [0.505 , 2.436]                  |
| Female x Age >75      | -0.216 [-1.092 , 0.66]            | 1.176 [-4.534 , 6.885]                  | 0.714 [0.537 , 0.949]            | 0.524 [0.138 , 1.997]                  | 0.972 [0.623 , 1.514]            | 2.021 [0.232 , 17.639]                 |
| Race: Non-White       | 0.373 [-0.054 , 0.8]              | -0.081 [-0.998 , 0.837]                 | 1.016 [0.914 , 1.13]             | 0.834 [0.661 , 1.053]                  | 1.331 [1.129 , 1.57]             | 1.27 [0.917 , 1.757]                   |
| Payer: Medicare       | -0.509 [-1.087 , 0.069]           | 0.011 [-1.218 , 1.239]                  | 0.608 [0.53 , 0.697]             | 0.803 [0.567 , 1.138]                  | 1.487 [1.167 , 1.895]            | 1.981 [1.114 , 3.52]                   |
| Payer: Medicaid       | 0.377 [-0.148 , 0.902]            | 1.126 [0.027 , 2.224]                   | 0.726 [0.63 , 0.838]             | 1.03 [0.741 , 1.432]                   | 1.584 [1.224 , 2.049]            | 1.638 [0.938 , 2.859]                  |
| Payer: Other          | -0.351 [-1.157 , 0.455]           | 1.791 [-0.61 , 4.192]                   | 0.719 [0.577 , 0.896]            | 0.832 [0.468 , 1.481]                  | 0.768 [0.478 , 1.234]            | 1.529 [0.579 , 4.042]                  |
| # Dx Codes: 8-11      | 1.081 [0.774 , 1.388]             | 1.123 [0.423 , 1.824]                   | 0.721 [0.624 , 0.833]            | 0.643 [0.447 , 0.924]                  | 1.248 [0.995 , 1.566]            | 1.272 [0.808 , 2.005]                  |
| # Dx Codes: 12-16     | 2.656 [2.182 , 3.129]             | 2.178 [1.145 , 3.211]                   | 0.505 [0.425 , 0.6]              | 0.603 [0.403 , 0.902]                  | 1.453 [1.096 , 1.926]            | 1.367 [0.819 , 2.279]                  |
| # Dx Codes: >17       | 5.745 [4.779 , 6.711]             | 8.556 [4.234 , 12.879]                  | 0.254 [0.196 , 0.328]            | 0.167 [0.067 , 0.415]                  | 1.484 [1.041 , 2.116]            | 0.99 [0.277 , 3.544]                   |
| Severity: Moderate    | -0.808 [-1.037 , -0.58]           | -0.397 [-0.902 , 0.109]                 | 1.325 [1.104 , 1.589]            | 1.446 [0.844 , 2.476]                  | 0.862 [0.626 , 1.186]            | 0.918 [0.487 , 1.728]                  |
| Severity: Major       | 1.671 [1.198 , 2.144]             | 1.741 [0.577 , 2.905]                   | 0.683 [0.547 , 0.853]            | 0.987 [0.555 , 1.754]                  | 0.986 [0.692 , 1.404]            | 0.666 [0.308 , 1.441]                  |
| # Dx 8-11 x Moderate  | 0.264 [-0.358 , 0.885]            | 1.317 [-0.903 , 3.536]                  | 0.811 [0.615 , 1.07]             | 0.652 [0.272 , 1.564]                  | 0.848 [0.525 , 1.37]             | 0.292 [0.062 , 1.379]                  |
| # Dx 8-11 x Major     | 0.158 [-0.463 , 0.778]            | -0.068 [-1.656 , 1.52]                  | 1.05 [0.807 , 1.366]             | 0.864 [0.436 , 1.709]                  | 1.143 [0.761 , 1.718]            | 1.473 [0.565 , 3.839]                  |
| # Dx 12-16 x Moderate | -0.115 [-0.984 , 0.755]           | -0.746 [-2.472 , 0.979]                 | 0.832 [0.58 , 1.193]             | 1.062 [0.394 , 2.86]                   | 0.598 [0.295 , 1.209]            | 0.207 [0.026 , 1.653]                  |
| # Dx 12-16 x Major    | 0.873 [0.183 , 1.563]             | 3.2 [1.266 , 5.134]                     | 1.092 [0.837 , 1.426]            | 0.683 [0.347 , 1.343]                  | 0.956 [0.63 , 1.452]             | 1.228 [0.505 , 2.986]                  |
| # Dx >17 x Moderate   | -2.028 [-3.551 , -0.506]          | -6.874 [-12.693 , -1.056]               | 0.925 [0.479 , 1.785]            | 2.057 [0.104 , 40.704]                 | 0.978 [0.379 , 2.521]            | 3.572 [0.108 , 117.971]                |
| # Dx >17 x Major      | 4.794 [3.499 , 6.089]             | 2.713 [-2.912 , 8.338]                  | 1.162 [0.836 , 1.616]            | 1.464 [0.498 , 4.305]                  | 1.264 [0.783 , 2.038]            | 1.879 [0.406 , 8.695]                  |
| Charlson Index=1      | 0.096 [-0.298 , 0.489]            | 0.388 [-0.62 , 1.397]                   | 0.934 [0.829 , 1.051]            | 0.969 [0.738 , 1.273]                  | 1.533 [1.246 , 1.886]            | 1.154 [0.768 , 1.733]                  |
| Charlson Index=2      | -0.665 [-1.153 , -0.178]          | -1.425 [-2.509 , -0.341]                | 0.895 [0.784 , 1.022]            | 1.038 [0.743 , 1.452]                  | 1.415 [1.134 , 1.765]            | 1.274 [0.819 , 1.983]                  |
| Charlson Index=3      | -0.968 [-1.52 , -0.416]           | -0.428 [-2.2 , 1.344]                   | 0.881 [0.76 , 1.02]              | 0.734 [0.491 , 1.096]                  | 1.479 [1.166 , 1.876]            | 1.039 [0.539 , 2]                      |

|                   |                          |                         |                       |                       |                       |                       |
|-------------------|--------------------------|-------------------------|-----------------------|-----------------------|-----------------------|-----------------------|
| Charlson Index>=4 | -1.617 [-2.167 , -1.067] | -0.099 [-1.641 , 1.443] | 0.886 [0.776 , 1.013] | 0.912 [0.659 , 1.263] | 1.914 [1.521 , 2.407] | 1.731 [1.032 , 2.902] |
| Admit Year=2017   | -0.221 [-0.562 , 0.121]  | 0.275 [-0.674 , 1.225]  | 0.954 [0.876 , 1.039] | 1.041 [0.833 , 1.301] | 1.066 [0.935 , 1.215] | 1.451 [1.08 , 1.951]  |
| Admit Year=2018   | -0.755 [-1.208 , -0.303] | -0.8 [-1.986 , 0.387]   | 0.908 [0.798 , 1.032] | 1.037 [0.736 , 1.46]  | 0.911 [0.74 , 1.121]  | 1.528 [0.948 , 2.462] |
| Admit Month: Feb  | -0.194 [-0.805 , 0.418]  | 0.229 [-1.469 , 1.926]  | 1.127 [0.963 , 1.32]  | 1.043 [0.699 , 1.555] | 0.822 [0.665 , 1.014] | 0.777 [0.453 , 1.333] |
| Admit Month: Mar  | -0.31 [-0.925 , 0.305]   | 0.024 [-1.355 , 1.402]  | 1.101 [0.937 , 1.293] | 0.763 [0.502 , 1.162] | 0.942 [0.764 , 1.162] | 1.026 [0.602 , 1.749] |
| Admit Month: Apr  | -0.333 [-1.053 , 0.387]  | -0.334 [-2.573 , 1.905] | 1.199 [1.019 , 1.41]  | 1.082 [0.71 , 1.65]   | 0.777 [0.626 , 0.964] | 1.131 [0.675 , 1.896] |
| Admit Month: May  | -0.945 [-1.537 , -0.352] | -0.572 [-1.918 , 0.775] | 1.159 [0.986 , 1.362] | 0.991 [0.662 , 1.482] | 0.669 [0.528 , 0.847] | 0.814 [0.463 , 1.43]  |
| Admit Month: Jun  | -0.319 [-1.067 , 0.428]  | -1.244 [-2.987 , 0.498] | 1.09 [0.91 , 1.306]   | 0.874 [0.538 , 1.42]  | 0.831 [0.645 , 1.071] | 0.663 [0.329 , 1.334] |
| Admit Month: Jul  | -0.404 [-1.199 , 0.392]  | -0.819 [-2.594 , 0.956] | 1.176 [0.976 , 1.417] | 1.422 [0.852 , 2.372] | 0.854 [0.663 , 1.099] | 1.119 [0.62 , 2.019]  |
| Admit Month: Aug  | -0.676 [-1.326 , -0.026] | -0.012 [-2.03 , 2.005]  | 1.299 [1.085 , 1.556] | 1.314 [0.789 , 2.189] | 0.964 [0.757 , 1.228] | 1.023 [0.548 , 1.907] |
| Admit Month: Sep  | -0.585 [-1.298 , 0.128]  | -0.239 [-2.606 , 2.128] | 1.253 [1.037 , 1.513] | 1.074 [0.653 , 1.768] | 0.927 [0.714 , 1.204] | 0.915 [0.485 , 1.727] |
| Admit Month: Oct  | -0.354 [-1.028 , 0.319]  | -1.101 [-2.546 , 0.344] | 1.163 [0.97 , 1.395]  | 0.976 [0.596 , 1.598] | 0.958 [0.75 , 1.224]  | 1.055 [0.583 , 1.908] |
| Admit Month: Nov  | 0.453 [-0.397 , 1.303]   | -0.946 [-2.624 , 0.732] | 1.195 [0.993 , 1.437] | 1.091 [0.7 , 1.699]   | 0.761 [0.582 , 0.996] | 1.003 [0.56 , 1.795]  |
| Admit Month: Dec  | -0.279 [-0.951 , 0.393]  | 1.26 [-0.977 , 3.497]   | 1.012 [0.84 , 1.221]  | 0.869 [0.538 , 1.402] | 0.868 [0.67 , 1.124]  | 0.787 [0.413 , 1.5]   |
| Constant          | 4.296 [3.552 , 5.04]     | 3.483 [1.591 , 5.375]   | 6.916 [5.444 , 8.787] | 5.552 [3.231 , 9.538] | 0.067 [0.046 , 0.097] | 0.068 [0.033 , 0.139] |

**Table A3: IMIP Effect Estimates: Sensitivity Analysis**

| Healthcare Process Metrics                     | Full Sample: At Least One Psychiatric or SUD Diagnosis | Higher Psychiatric Complexity: SUD Plus Psychiatric Diagnoses |
|------------------------------------------------|--------------------------------------------------------|---------------------------------------------------------------|
| Length of Stay (Days)                          | -0.447 [-1.016 , 0.122]                                | -1.353 [-2.268 , -0.439]*                                     |
| Probability of Discharge to Home (Odds Ratio)  | 1.029 [0.91 , 1.163]                                   | 1.381 [1.124 , 1.696]*                                        |
| Probability of 30-Day Readmission (Odds Ratio) | 1.109 [0.91 , 1.351]                                   | 0.755 [0.564 , 1.009]                                         |
| Non-IMIP n                                     | 14,372                                                 | 1,514                                                         |
| IMIP n                                         | 2,220                                                  | 937                                                           |

**Table A4: Full Regression Output – Sensitivity Analysis**

| Covariate  | LOS                               |                                         | Discharge to Home                |                                        | 30-Day Readmission               |                                        |
|------------|-----------------------------------|-----------------------------------------|----------------------------------|----------------------------------------|----------------------------------|----------------------------------------|
|            | Full Sample (Coefficient, 95% CI) | Higher Complexity (Coefficient, 95% CI) | Full Sample (Odds Ratio, 95% CI) | Higher Complexity (Odds Ratio, 95% CI) | Full Sample (Odds Ratio, 95% CI) | Higher Complexity (Odds Ratio, 95% CI) |
| IMIP=1     | -0.447 [-1.016 , 0.122]           | -1.353 [-2.268 , -0.439]                | 1.029 [0.91 , 1.163]             | 1.381 [1.124 , 1.696]                  | 1.109 [0.91 , 1.351]             | 0.755 [0.564 , 1.009]                  |
| Female=1   | 0.13 [-0.352 , 0.612]             | 0.247 [-0.78 , 1.273]                   | 1.04 [0.876 , 1.235]             | 0.877 [0.635 , 1.21]                   | 1.074 [0.792 , 1.457]            | 0.899 [0.575 , 1.405]                  |
| Age: 46-60 | 0.376 [-0.12 , 0.872]             | -0.314 [-1.329 , 0.701]                 | 0.893 [0.768 , 1.038]            | 0.977 [0.702 , 1.359]                  | 0.822 [0.636 , 1.062]            | 0.949 [0.619 , 1.456]                  |

|                       |                          |                           |                       |                       |                       |                        |
|-----------------------|--------------------------|---------------------------|-----------------------|-----------------------|-----------------------|------------------------|
| Age: 61-75            | 1.072 [0.351 , 1.793]    | 1.312 [-0.272 , 2.896]    | 0.574 [0.489 , 0.674] | 0.57 [0.389 , 0.835]  | 0.82 [0.607 , 1.109]  | 0.782 [0.46 , 1.329]   |
| Age: >75              | 0.54 [-0.288 , 1.367]    | -0.035 [-3.215 , 3.146]   | 0.255 [0.209 , 0.311] | 0.355 [0.141 , 0.894] | 0.537 [0.392 , 0.736] | 0.459 [0.13 , 1.618]   |
| Female x Age 46-60    | -0.659 [-1.416 , 0.098]  | 0.228 [-1.615 , 2.071]    | 0.876 [0.7 , 1.096]   | 0.979 [0.631 , 1.517] | 0.955 [0.65 , 1.403]  | 1.4 [0.75 , 2.613]     |
| Female x Age 61-75    | -0.706 [-1.55 , 0.138]   | -2.437 [-4.316 , -0.559]  | 0.788 [0.633 , 0.98]  | 1.275 [0.766 , 2.123] | 0.825 [0.563 , 1.208] | 0.826 [0.403 , 1.694]  |
| Female x Age >75      | -0.242 [-1.111 , 0.628]  | 3.165 [-2.15 , 8.481]     | 0.696 [0.541 , 0.895] | 0.53 [0.144 , 1.955]  | 0.869 [0.583 , 1.295] | 1.257 [0.231 , 6.826]  |
| Race: Non-White       | 0.359 [-0.048 , 0.767]   | -0.284 [-1.144 , 0.576]   | 1.002 [0.911 , 1.103] | 0.831 [0.67 , 1.032]  | 1.398 [1.194 , 1.637] | 1.413 [1.058 , 1.887]  |
| Payer: Medicare       | -0.377 [-0.915 , 0.161]  | 0.183 [-0.975 , 1.34]     | 0.6 [0.529 , 0.681]   | 0.801 [0.585 , 1.096] | 1.572 [1.246 , 1.984] | 2.032 [1.231 , 3.354]  |
| Payer: Medicaid       | 0.507 [0.02 , 0.995]     | 1.381 [0.339 , 2.423]     | 0.654 [0.574 , 0.745] | 0.872 [0.65 , 1.169]  | 1.71 [1.345 , 2.173]  | 1.665 [1.032 , 2.684]  |
| Payer: Other          | -0.315 [-1.003 , 0.374]  | 1.606 [-0.33 , 3.543]     | 0.64 [0.528 , 0.775]  | 0.632 [0.391 , 1.022] | 0.758 [0.502 , 1.145] | 1.474 [0.675 , 3.217]  |
| # Dx Codes: 8-11      | 1.098 [0.8 , 1.395]      | 1.259 [0.587 , 1.931]     | 0.746 [0.654 , 0.85]  | 0.747 [0.548 , 1.019] | 1.154 [0.936 , 1.423] | 1.142 [0.759 , 1.72]   |
| # Dx Codes: 12-16     | 2.762 [2.316 , 3.207]    | 2.434 [1.441 , 3.428]     | 0.523 [0.449 , 0.609] | 0.736 [0.515 , 1.052] | 1.359 [1.055 , 1.751] | 1.367 [0.869 , 2.15]   |
| # Dx Codes: >17       | 5.771 [4.881 , 6.661]    | 8.758 [4.589 , 12.926]    | 0.253 [0.199 , 0.323] | 0.177 [0.078 , 0.402] | 1.4 [1.016 , 1.929]   | 0.908 [0.306 , 2.698]  |
| Severity: Moderate    | -0.882 [-1.1 , -0.663]   | -0.384 [-0.866 , 0.097]   | 1.249 [1.066 , 1.465] | 1.231 [0.811 , 1.867] | 0.88 [0.668 , 1.161]  | 0.892 [0.505 , 1.574]  |
| Severity: Major       | 1.582 [1.108 , 2.056]    | 1.402 [0.355 , 2.449]     | 0.698 [0.568 , 0.857] | 0.917 [0.57 , 1.476]  | 1.022 [0.739 , 1.415] | 0.917 [0.471 , 1.784]  |
| # Dx 8-11 x Moderate  | 0.302 [-0.254 , 0.859]   | 1.058 [-0.837 , 2.953]    | 0.807 [0.631 , 1.03]  | 0.746 [0.369 , 1.51]  | 0.813 [0.529 , 1.251] | 0.599 [0.203 , 1.771]  |
| # Dx 8-11 x Major     | 0.208 [-0.401 , 0.818]   | 0.381 [-1.073 , 1.836]    | 1.038 [0.813 , 1.325] | 0.84 [0.475 , 1.487]  | 1.148 [0.79 , 1.667]  | 1.162 [0.517 , 2.608]  |
| # Dx 12-16 x Moderate | 0.101 [-0.719 , 0.921]   | -0.598 [-2.383 , 1.188]   | 0.777 [0.568 , 1.063] | 1.373 [0.572 , 3.292] | 0.591 [0.323 , 1.083] | 0.157 [0.02 , 1.237]   |
| # Dx 12-16 x Major    | 0.793 [0.118 , 1.468]    | 3.431 [1.619 , 5.243]     | 1.127 [0.882 , 1.44]  | 0.724 [0.404 , 1.298] | 0.983 [0.671 , 1.44]  | 0.953 [0.439 , 2.072]  |
| # Dx >17 x Moderate   | -1.583 [-2.998 , -0.168] | -6.499 [-11.816 , -1.182] | 0.884 [0.491 , 1.593] | 2.582 [0.23 , 28.941] | 1 [0.442 , 2.265]     | 2.264 [0.091 , 56.468] |
| # Dx >17 x Major      | 4.955 [3.717 , 6.193]    | 3.107 [-2.246 , 8.459]    | 1.245 [0.913 , 1.697] | 1.893 [0.724 , 4.949] | 1.185 [0.767 , 1.829] | 1.314 [0.349 , 4.942]  |
| Charlson Index=1      | -0.012 [-0.379 , 0.356]  | 0.307 [-0.605 , 1.219]    | 0.942 [0.847 , 1.046] | 0.908 [0.718 , 1.148] | 1.48 [1.224 , 1.789]  | 1.087 [0.76 , 1.554]   |
| Charlson Index=2      | -0.781 [-1.244 , -0.318] | -1.241 [-2.292 , -0.189]  | 0.895 [0.791 , 1.012] | 0.907 [0.671 , 1.225] | 1.482 [1.208 , 1.818] | 1.399 [0.94 , 2.082]   |
| Charlson Index=3      | -0.991 [-1.531 , -0.451] | -0.627 [-2.316 , 1.062]   | 0.926 [0.809 , 1.061] | 0.795 [0.55 , 1.149]  | 1.511 [1.205 , 1.895] | 1.167 [0.662 , 2.058]  |
| Charlson Index>=4     | -1.719 [-2.248 , -1.19]  | -0.085 [-1.527 , 1.358]   | 0.893 [0.789 , 1.01]  | 0.788 [0.581 , 1.067] | 1.987 [1.605 , 2.461] | 1.954 [1.261 , 3.029]  |
| Admit Year=2017       | -0.256 [-0.585 , 0.073]  | 0.064 [-0.802 , 0.931]    | 0.957 [0.884 , 1.035] | 0.95 [0.777 , 1.163]  | 1.105 [0.975 , 1.253] | 1.364 [1.029 , 1.807]  |
| Admit Year=2018       | -0.671 [-1.102 , -0.24]  | -0.824 [-1.992 , 0.343]   | 0.911 [0.81 , 1.025]  | 0.903 [0.668 , 1.219] | 0.912 [0.755 , 1.102] | 1.338 [0.879 , 2.038]  |
| Admit Month: Feb      | -0.147 [-0.728 , 0.433]  | 0.496 [-1.142 , 2.134]    | 1.132 [0.978 , 1.31]  | 1.083 [0.748 , 1.569] | 0.805 [0.658 , 0.985] | 0.871 [0.521 , 1.454]  |
| Admit Month: Mar      | -0.192 [-0.782 , 0.399]  | 0.374 [-1.086 , 1.833]    | 1.097 [0.945 , 1.273] | 0.78 [0.538 , 1.129]  | 0.999 [0.82 , 1.217]  | 1.39 [0.854 , 2.262]   |
| Admit Month: Apr      | -0.355 [-1.036 , 0.326]  | -0.596 [-2.599 , 1.406]   | 1.129 [0.972 , 1.312] | 0.949 [0.645 , 1.397] | 0.792 [0.647 , 0.971] | 1.272 [0.791 , 2.046]  |
| Admit Month: May      | -1.038 [-1.586 , -0.491] | -0.658 [-1.905 , 0.588]   | 1.124 [0.967 , 1.306] | 0.976 [0.678 , 1.404] | 0.739 [0.595 , 0.918] | 1.029 [0.623 , 1.699]  |
| Admit Month: Jun      | -0.355 [-1.053 , 0.343]  | -1.398 [-2.973 , 0.178]   | 1.04 [0.879 , 1.23]   | 0.781 [0.505 , 1.209] | 0.828 [0.655 , 1.048] | 0.934 [0.515 , 1.693]  |
| Admit Month: Jul      | -0.252 [-1.013 , 0.508]  | -0.764 [-2.412 , 0.885]   | 1.193 [1.004 , 1.418] | 1.38 [0.872 , 2.183]  | 0.843 [0.665 , 1.067] | 1.01 [0.583 , 1.75]    |
| Admit Month: Aug      | -0.564 [-1.182 , 0.055]  | 0.251 [-1.594 , 2.097]    | 1.248 [1.056 , 1.475] | 1.118 [0.716 , 1.744] | 1.012 [0.809 , 1.265] | 1.341 [0.782 , 2.301]  |
| Admit Month: Sep      | -0.64 [-1.308 , 0.027]   | -0.277 [-2.426 , 1.872]   | 1.204 [1.011 , 1.433] | 0.986 [0.629 , 1.545] | 0.98 [0.773 , 1.244]  | 1.063 [0.61 , 1.854]   |
| Admit Month: Oct      | -0.389 [-1.02 , 0.242]   | -0.959 [-2.283 , 0.365]   | 1.15 [0.971 , 1.361]  | 1.059 [0.678 , 1.654] | 0.916 [0.726 , 1.157] | 1.141 [0.655 , 1.989]  |
| Admit Month: Nov      | 0.649 [-0.216 , 1.514]   | -0.89 [-2.466 , 0.686]    | 1.18 [0.995 , 1.399]  | 1.149 [0.758 , 1.741] | 0.764 [0.595 , 0.98]  | 0.897 [0.512 , 1.571]  |
| Admit Month: Dec      | -0.272 [-0.905 , 0.361]  | 1.179 [-0.855 , 3.213]    | 1.002 [0.843 , 1.191] | 0.845 [0.548 , 1.301] | 0.9 [0.711 , 1.141]   | 0.945 [0.545 , 1.639]  |

|          |                       |                       |                      |                       |                       |                       |
|----------|-----------------------|-----------------------|----------------------|-----------------------|-----------------------|-----------------------|
| Constant | 4.232 [3.547 , 4.916] | 3.508 [1.778 , 5.237] | 5.44 [4.405 , 6.719] | 4.288 [2.628 , 6.995] | 0.067 [0.048 , 0.095] | 0.065 [0.032 , 0.132] |
|----------|-----------------------|-----------------------|----------------------|-----------------------|-----------------------|-----------------------|
